# Supplementary material
Source: Royal Society of Chemistry journal article supplement (doi:10.1039/d6ja00127k)
Supplement: d6ja00127k1.pdf [file d6ja00127k1.pdf]

## Supporting Information

# Towards an automated approach for rapid separation of actinides using a liquid handling system

*Nicholas P. Richard\**, Sean, R. Scott, Christian Berry, Matthew RisenHuber, William Munley,  
Karen Noyes, Matt Douglas, Lori Metz

<sup>1</sup>Pacific Northwest National Laboratory, Richland, WA, 99352 USA

## Table of Contents

|                                                                                                                                                                               |   |
|-------------------------------------------------------------------------------------------------------------------------------------------------------------------------------|---|
| Figure S1. Image of the 3D printed column piece positioned in the 3D printed column holder with the 3D printed positive pressure piece attached to a compressed air line..... | 2 |
| Figure S2. Hamilton setup for microchemistry.....                                                                                                                             | 3 |

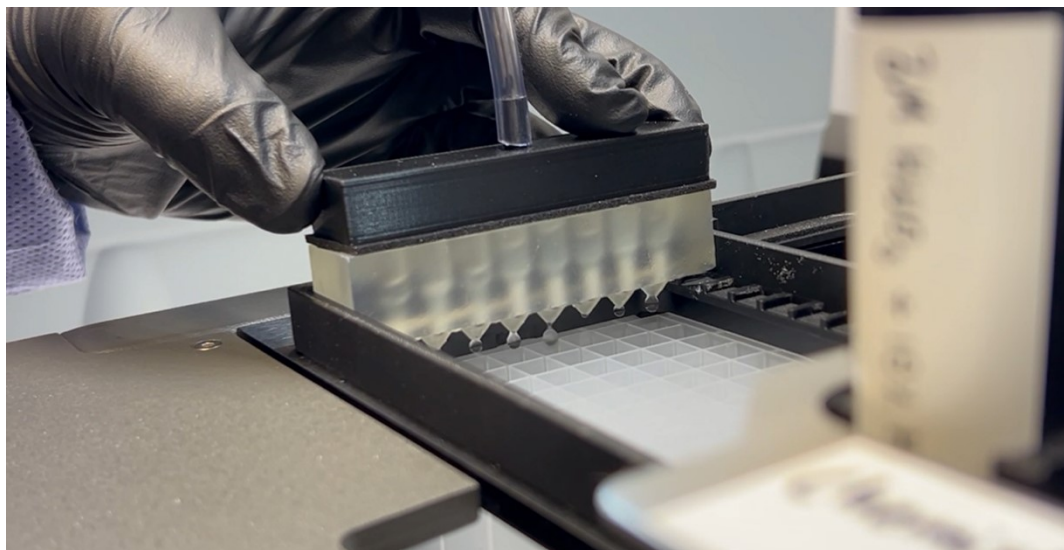

Figure S1. Image of the 3D printed column piece positioned in the 3D printed column holder with the 3D printed positive pressure piece attached to a compressed air line.

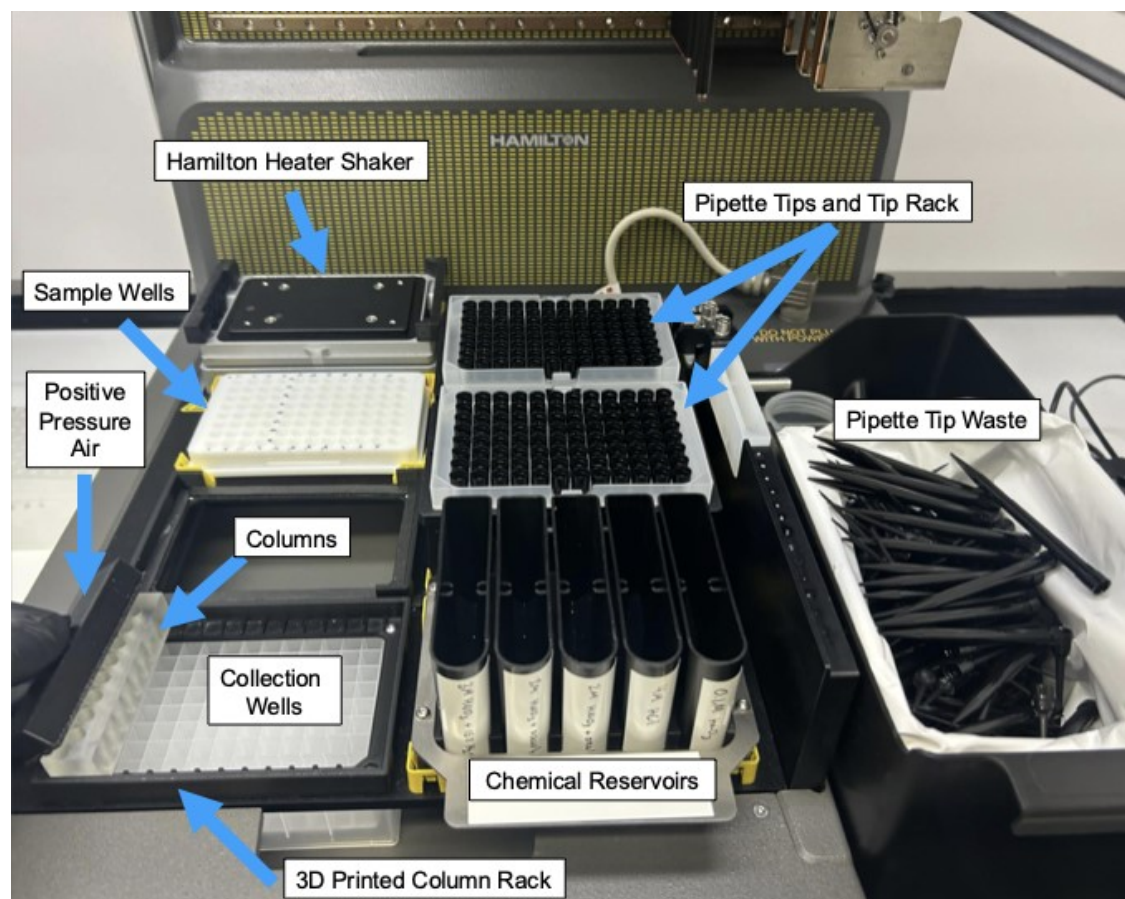

Figure 2. Hamilton setup for microchemistry showing custom-designed and purchased components. The sample wells were custom-machined specifically for this project, while the columns, collection wells, column rack, and positive air pressure system were 3D-printed. The heat shaker, pipette tips and tip rack, waste container, chemical reservoirs, and collection well are commercial components purchased with the Hamilton system.
