# Supplementary material
Source: Royal Society of Chemistry journal article supplement (doi:10.1039/d6ja00127k)
Supplement: d6ja00127k2.xlsx [file d6ja00127k2.xlsx]

## Sheet: Table S1 - SRMs
Table S1. Standard Reference Materials and Certified Reference Materials
All materials, used for calibration, validation, and testing
Material ID	Full Name/Description	Category	Matrix Composition
NIST SRM 4354	Freshwater Lake Sediment	Sediment	Freshwater lake sediment; elevated natural actinides
NIST SRM 612	Trace Elements in Glass	Glass	Synthetic glass; NIST 610 series trace element glass
NIST SRM 2706	Marine Sediment	Sediment	Marine sediment; moderate heavy metal content
NIST SRM 2709a	San Joaquin Soil	Soil	Agricultural soil from California; silicate matrix with organic matter
NIST SRM 2711a	Montana Soil I	Soil	Soil from Butte-Silver Bow area, Montana; heavy metal contaminated
NIST SRM 2780a	Hard Rock Mine Waste	Mine Waste	Hard rock mine waste; elevated As, Cd, Cu, Pb, Zn
NIST SRM 1646a	Estuarine Sediment	Sediment	Estuarine sediment from Chesapeake Bay; mixed silicate/carbonate matrix
NIST SRM 4350b	Columbia River Sediment	Sediment	River sediment from Columbia River near Hanford, Washington
NIST SRM 4353	Rocky Flats Soil Number 1	Contaminated Soil	Soil from Rocky Flats Plant site; plutonium contaminated
NIST SRM 4353a	Rocky Flats Soil Number 1 (updated)	Contaminated Soil	Updated certification of SRM 4353; plutonium contaminated soil
CRM-137	Plutonium-239 Spike Assay and Isotopic Standard	Isotopic Standard	Pu metal dissolved in HNO₃; certified isotopic composition
CRM-138	Plutonium-239 Spike Assay and Isotopic Standard	Isotopic Standard	Pu metal dissolved in HNO₃; certified isotopic composition
IRMM-0243	Americium-243 Standard Solution	Isotopic Standard	Am-243 in dilute HNO₃; certified for ²⁴¹Am/²⁴³Am
TB-Macusani	High-silica Obsidian Glass (Peru)	Glass	Natural rhyolite glass; high SiO₂ (>75%); high U content (~20 ppm)
Basalt B3	Hawaiian Tholeiitic Basalt	Crystalline Rock	Crystalline basaltic rock; Hawaiian tholeiite; low SiO₂ (~47%)
AGV-2G	Andesite Glass (AGV-2 analog)	Glass	Glass prepared from USGS AGV-2 andesite powder; intermediate SiO₂ (~59%)

## Sheet: Table S2 - Cup Configuration
Table S2. Faraday Cup and Ion-Counting Detector (SEM/CDD) Configuration
Detector cup assignments for Pu, U, Am, and Np, isotopes across the collector array. CDD stands for compact discrete dynode, while SEM stands for secondary electron multiplier.
Cup	CDD2	SEM3	SEM2	SEM1	CDD1	L4
Pu	²³⁹Pu	²⁴⁰Pu	²⁴⁰Pu	²⁴²Pu	²⁴⁴Pu
U	²³³U	²³⁴U	²³⁵U	²³⁶U		²³⁸U
Am		²⁴¹Am		²⁴³Am
Np		²³⁷Np		²³⁹Np

## Sheet: Table S3 - Gravity
Table S3. Gravity-Driven Columns - Sample Information
Sample identification, experimental parameters, and actinide recovery fraction for gravity-driven UTEVA column separations, with uranium isotope ratios (relative to 238U) by multi-ion counting and Faraday cups (±2σ), plutonium isotope ratios (relative to 239Pu by multi-ion counting (±2σ), and inter-element isotope ratios (±2σ), including analytical notes and certified reference material spike qua…
Date	Sample Code	Sample ID	Experiment Goal	U Recovery	Pu Recovery	Np Recovery	Resin Type	²³³U/²³⁸Ua	SDa	²³⁴U/²³⁸Ua	SDa	²³⁵U/²³⁸Ua	SDa	²³⁶U/²³⁸Ua	SDa	²³⁴U/²³⁸Ub	SDb	²³⁵U/²³⁸Ub	SDb	²³⁶U/²³⁸Ub	SDb	²⁴⁰Pu/²³⁹Puc	SDc	²⁴¹Pu/²³⁹Puc	SDc	²⁴²Pu/²³⁹Puc	SDc	²⁴⁴Pu/²³⁹Puc	SDc	²³⁷Np/²³⁹Pu	SD	239Pu/238U	SD	Notes	CRM 137 Spike (fg)	CRM 138 Spike (fg)	²³⁷Np Spike (fg)	233U Spike pg
2024-10-17	SRS032-1	1646a	U recovery rates	0.589351			Uteva	2.27319e-07	5.09426e-07	5.73464e-05	9.46119e-06	0.00725886	9.24606e-05	2.81753e-06	2.02292e-06	5.90845e-05	6.61857e-07	0.00725309	5.34794e-07	1.04926e-08	9.78598e-10													Yield & Blank Corrected
2024-10-17	SRS032-2	2706	U recovery rates	0.665484			Uteva	-7.90337e-08	2.44647e-07	5.27101e-05	5.73082e-06	0.00728925	8.25168e-05	1.50777e-06	1.72962e-06	5.55273e-05	1.94704e-07	0.00724969	3.08297e-06	1.99782e-08	8.93036e-10													Yield & Blank Corrected
2024-10-17	SRS032-3	2711a	U recovery rates	0.752336			Uteva	6.65403e-08	5.02863e-07	5.15113e-05	5.79824e-06	0.00728766	6.07312e-05	6.84409e-07	1.44477e-06	5.18966e-05	2.00643e-07	0.00725279	3.13865e-06	1.06513e-08	8.86147e-10													Yield & Blank Corrected
2024-10-17	SRS032-4	2780a	U recovery rates	0.302672			Uteva	-1.2533e-07	3.70939e-07	6.12452e-05	1.19313e-05	0.00728748	0.000149726	2.46943e-06	3.66591e-06	6.3439e-05	3.34277e-07	0.00725265	5.13499e-06	1.3208e-08	2.20968e-09													Yield & Blank Corrected
2024-10-17	SRS032-5	4350b	U recovery rates	0.602132			Uteva	1.24636e-07	8.52051e-07	5.89411e-05	7.02225e-06	0.00726687	8.71053e-05	1.54948e-06	1.6913e-06	5.95434e-05	2.35476e-07	0.0072487	5.36953e-07	5.90521e-08	6.40627e-10													Yield & Blank Corrected
2024-10-24	SRS033-2	NIST2709a	U & Pu recovery rates	0.792261	0.816173		Uteva			5.71159e-05	6.57145e-06	0.00725405	7.97264e-05									0.25086	0.00803743	0.0128241	0.00513335	0.0168289	0.00208891							Yield & Blank Corrected	10
2024-10-24	SRS033-3	NIST2709a	U & Pu recovery rates	0.783006	0.959711		Uteva			5.66679e-05	5.50745e-06	0.0072708	6.62995e-05									0.235473	0.00617961	0.00457563	0.00180858	0.0155186	0.00108107							Yield & Blank Corrected	30
2024-10-24	SRS033-4	NIST2709a	U & Pu recovery rates	0.749844	0.927152		Uteva			5.48851e-05	5.93748e-06	0.00726889	6.88867e-05									0.248145	0.00333996	0.00533463	0.000503888	0.0161294	0.000743778							Yield & Blank Corrected	100
2024-11-18	SRS035-2	NIST1646a	co-separation of Np and Pu				Uteva																							0.00336571	0.0001011			Yield & Blank Corrected		245	1.2
2024-11-18	SRS035-3	NIST1646a	co-separation of Np and Pu				Uteva																							0.00342311	9.6989e-05			Yield & Blank Corrected		226	1.1
2024-11-18	SRS035-4	NIST1646a	co-separation of Np and Pu				Uteva																							0.00257742	6.4706e-05			Yield & Blank Corrected		316	1.2
2025-01-16	SRS036-2	NIST2709a	Measuring Pu on IC and U as oxide				Uteva	1.16225	0.00659033			0.00721617	2.27291e-05																			0.000813662	1.01564e-05	Raw Ratios		43		58
2025-01-16	SRS036-3	NIST2709a	Measuring Pu on IC and U as oxide				Uteva	1.16564	0.00408782			0.00720916	1.33936e-05																			0.000873091	1.04347e-05	Raw Ratios		43		58
2025-04-01	SRS-037	NIST2709a	AG1-X4 resin testing	0.780553			AG1-X4																											Yield, Blank, & Standard Corrected
2025-04-01	SRS-037-1	NIST2709a	AG1-X4 resin testing				AG1-X4	0.0105817	0.00132002	5.33479e-05	5.27486e-06	0.00724093	7.71463e-05	3.21579e-05	-0.000813089																			Yield, Blank, & Standard Corrected
2025-04-01	SRS-037-2	NIST2709a	AG1-X4 resin testing				AG1-X4	0.010841	0.00115961	5.45609e-05	6.14041e-06	0.00722805	7.12212e-05	0.000173296	-0.000684951																			Yield, Blank, & Standard Corrected
2025-04-01	SRS-037-3	NIST2709a	AG1-X4 resin testing				AG1-X4	0.0107724	0.00102514	5.30645e-05	5.13482e-06	0.0072186	6.74792e-05	0.000336767	-0.000626518																			Yield, Blank, & Standard Corrected
a Uranium isotope ratios measured by multi-ion counting (MIC).
b Uranium isotope ratios measured by Faraday cup detection.

## Sheet: Table S4 - Micro
Table S4. Microchemistry - Sample Information
Sample identification, experimental parameters, and actinide recovery fractions for microchemistry samples, with uranium and plutonium isotope ratios measured by multi-ion counting (±2σ)
Date	Sample Code	Sample ID	Experiment Goal	U Recovery	Pu Recovery	Np Recovery	Am Recovery	Resin Type	²³⁴U/²³⁸U	SD	²³⁵U/²³⁸U	SD	²³⁶U/²³⁸U	SD	²⁴⁰Pu/²³⁹Pu	SD	²⁴¹Pu/²³⁹Pu		Notes
2025-05-08	ML_1	NIST2709a	U Recovories with AG1-X4	0.364886				AG1-X4	5.80166e-05	7.5376e-06	0.00726804	6.7624e-05	1.07654e-06	7.7111e-07					Yield & Blank Corrected
2025-05-08	ML_2	NIST2709a	U Recovories with AG1-X4	0.0360108				AG1-X4	5.48064e-05	1.5616e-05	0.00723757	0.00022888	8.25825e-06	7.2971e-06					Yield & Blank Corrected
2025-05-08	ML_3	NIST2709a	U Recovories with AG1-X4	0.312418				AG1-X4	5.5264e-05	5.6967e-06	0.00724378	6.1771e-05	1.47311e-06	9.8208e-07					Yield & Blank Corrected
2025-05-08	ML_4	NIST2709a	U Recovories with AG1-X4	0.389138				AG1-X4	5.82522e-05	5.164e-06	0.0072576	4.7371e-05	1.43741e-06	1.2347e-06					Yield & Blank Corrected
2025-05-08	ML_5	NIST2709a	U Recovories with AG1-X4	0.337339				AG1-X4	5.78267e-05	3.9428e-06	0.00723847	4.1579e-05	7.45277e-07	1.0021e-06					Yield & Blank Corrected
2025-05-08	ML_6	NIST2709a	U Recovories with AG1-X4	0.286732				AG1-X4	5.49343e-05	7.154e-06	0.00722038	5.3354e-05	1.36845e-06	1.3522e-06					Yield & Blank Corrected
2025-05-08	ML_7	NIST2709a	U Recovories with AG1-X4	0.358761				AG1-X4	5.81647e-05	4.2151e-06	0.00725569	5.6746e-05	7.17639e-07	1.0197e-06					Yield & Blank Corrected
2025-05-08	ML_8	NIST2709a	U Recovories with AG1-X4	0.387876				AG1-X4	5.83765e-05	6.2231e-06	0.00726028	6.1959e-05	9.06236e-07	9.1222e-07					Yield & Blank Corrected
2025-05-13	ML_2	NIST2709a	U Recovories with UTEVA	0.490316				UTEVA	5.75205e-05	4.8991e-06	0.0072782	6.372e-05	6.89627e-06	1.7762e-06					Yield & Blank Corrected
2025-05-13	ML_3	NIST2709a	U Recovories with UTEVA	0.471761				UTEVA	5.88609e-05	4.1098e-06	0.00727063	5.0493e-05	6.34015e-06	1.676e-06					Yield & Blank Corrected
2025-05-13	ML_4	NIST2709a	U Recovories with UTEVA	0.471037				UTEVA	5.4328e-05	5.0714e-06	0.00729202	4.4877e-05	5.98276e-06	1.8053e-06					Yield & Blank Corrected
2025-05-13	ML_5	NIST2709a	U Recovories with UTEVA	0.46418				UTEVA	5.66177e-05	5.2861e-06	0.00727967	5.9005e-05	6.17369e-06	2.4152e-06					Yield & Blank Corrected
2025-05-13	ML_6	NIST2709a	U Recovories with UTEVA	0.530788				UTEVA	5.4863e-05	5.391e-06	0.00728829	4.6307e-05	5.32308e-06	1.8643e-06					Yield & Blank Corrected
2025-05-13	ML_7	NIST2709a	U Recovories with UTEVA	0.518263				UTEVA	5.67405e-05	5.208e-06	0.00729759	4.5454e-05	4.80122e-06	1.759e-06					Yield & Blank Corrected
2025-05-13	ML_8	NIST2709a	U Recovories with UTEVA	0.459301				UTEVA	6.0545e-05	4.5365e-06	0.00724741	5.8026e-05	8.98588e-06	2.2126e-06					Yield & Blank Corrected
2025-05-19	ML_1	NIST4350b	Follow up U Recovories with AG1-X4	0.339687				AG1-X4	5.68133e-05	5.9834e-06	0.00722731	8.424e-05	5.79683e-07	8.646e-07					Yield & Blank Corrected
2025-05-19	ML_2	NIST4353	Follow up U Recovories with AG1-X4	0.209527				AG1-X4	6.004e-05	8.5975e-06	0.00723086	9.2559e-05	3.1655e-07	8.2571e-07					Yield & Blank Corrected
2025-05-19	ML_3	NIST4353a	Follow up U Recovories with AG1-X4	0.307338				AG1-X4	5.81025e-05	6.1239e-06	0.00720353	7.3677e-05	9.12993e-07	9.7591e-07					Yield & Blank Corrected
2025-05-19	ML_4	NIST4354	Follow up U Recovories with AG1-X4	0.294812				AG1-X4	6.08394e-05	1.131e-05	0.00722128	7.7263e-05	6.47478e-07	1.1525e-06					Yield & Blank Corrected
2025-05-19	ML_5	NIST4350b	Follow up U Recovories with AG1-X4	0.293885				AG1-X4	6.14916e-05	6.786e-06	0.00717989	0.00010007	8.59229e-07	1.3363e-06					Yield & Blank Corrected
2025-05-19	ML_6	NIST4353	Follow up U Recovories with AG1-X4	0.240152				AG1-X4	5.7605e-05	8.7115e-06	0.00718516	0.00010873	1.13936e-06	1.6333e-06					Yield & Blank Corrected
2025-05-19	ML_7	NIST4353a	Follow up U Recovories with AG1-X4	0.297007				AG1-X4	6.33045e-05	5.4265e-06	0.00717289	7.512e-05	1.22648e-06	1.4108e-06					Yield & Blank Corrected
2025-05-19	ML_8	NIST4354	Follow up U Recovories with AG1-X4	0.326148				AG1-X4	5.60154e-05	1.0412e-05	0.00722573	0.00010876	1.9862e-06	2.2951e-06					Yield & Blank Corrected
2025-05-29	ML_2	NIST2709a	Double Stacked UTEVA/DGA	0.585447	0.520344	0.226923	0.188612	UTEVA - DGA							0.2249	0.0147	0.00244565	0.0017349	Yield, Blank, & Standard Corrected
2025-05-29	ML_3	NIST2709a	Double Stacked UTEVA/DGA	0.535468	0.47315	0.209831	0.248431	UTEVA - DGA							0.228	0.017	0.00311419	0.0024582	Yield, Blank, & Standard Corrected
2025-05-29	ML_4	NIST2709a	Double Stacked UTEVA/DGA	0.609748	0.583678	0.252749	0.241807	UTEVA - DGA							0.2295	0.0096	0.00449741	0.0034549	Yield, Blank, & Standard Corrected
2025-05-29	ML_5	NIST2709a	Double Stacked UTEVA/DGA	0.634974	0.576745	0.279416	0.231621	UTEVA - DGA							0.2219	0.0129	0.00381533	0.0021347	Yield, Blank, & Standard Corrected
2025-05-29	ML_6	NIST2709a	Double Stacked UTEVA/DGA	0.621592	1.10121	0.259334	0.367406	UTEVA - DGA							0.2297	0.0076	0.00327195	0.0020928	Yield, Blank, & Standard Corrected
2025-05-29	ML_7	NIST2709a	Double Stacked UTEVA/DGA	0.587855	0.522129	0.251853	0.331421	UTEVA - DGA							0.2272	0.0177	0.00404143	0.0029592	Yield, Blank, & Standard Corrected
2025-05-29	ML_8	NIST2709a	Double Stacked UTEVA/DGA	0.677606	0.678218	0.299155	0.330821	UTEVA - DGA							0.2283	0.0097	0.0047001	0.0025695	Yield, Blank, & Standard Corrected
2025-08-11	ML_1	NIST4354	Np with 100 - 150 μm resin size			0.343511		UTEVA
2025-08-11	ML_2	NIST4354	Np with 100 - 150 μm resin size			0.320116		UTEVA
2025-08-11	ML_3	NIST4354	Np with 100 - 150 μm resin size			0.282033		UTEVA
2025-08-11	ML_5	NIST4354	Np with 100 - 150 μm resin size			0.366746		UTEVA
2025-08-11	ML_6	NIST4354	Np with 100 - 150 μm resin size			0.309452		UTEVA
2025-08-11	ML_7	NIST4354	Np with 100 - 150 μm resin size			0.325098		UTEVA
2025-08-12	ML_1	NIST4354	Np with 50 - 100 μm resin size			0.406635		UTEVA
2025-08-12	ML_2	NIST4354	Np with 50 - 100 μm resin size			0.344006		UTEVA
2025-08-12	ML_3	NIST4354	Np with 50 - 100 μm resin size			0.333337		UTEVA
2025-08-12	ML_5	NIST4354	Np with 50 - 100 μm resin size			0.352669		UTEVA
2025-08-12	ML_6	NIST4354	Np with 50 - 100 μm resin size			0.355608		UTEVA
2025-08-12	ML_7	NIST4354	Np with 50 - 100 μm resin size			0.376372		UTEVA
2025-09-12	ML_7	NIST4354	Np with 50-100 mμ resin particle size & 25 μL column volume			0.193914		UTEVA
2025-09-12	ML_7	NIST4354	Np with 50-100 mμ resin particle size & 25 μL column volume			0.167644		UTEVA
2025-09-12	ML_7	NIST4354	Np with 50-100 mμ resin particle size & 25 μL column volume			0.163204		UTEVA
2025-09-12	ML_7	NIST4354	Np with 50-100 mμ resin particle size & 25 μL column volume			0.189732		UTEVA
2025-09-12	ML_7	NIST4354	Np with 50-100 mμ resin particle size & 25 μL column volume			0.188094		UTEVA
2025-09-12	ML_7	NIST4354	Np with 50-100 mμ resin particle size & 25 μL column volume			0.304143		UTEVA

## Sheet: Table S5 - Dissolution
Table S5. Dissolution Experiments - Sample Information
Dissolution experiment sample identification, experimental parameters, and actinide recovery rates, with uranium isotope ratios (relative to ²³⁸U) measured by multi‑ion counting and Faraday cups (±2σ), including analytical notes.
Date	Sample Code	Sample ID	Experiment Goal	Wt. (mg)	U Recovery	Resin Type	²³³U/²³⁸Ua	SDa	²³⁴U/²³⁸Ua	SDa	²³⁵U/²³⁸Ua	SDa	²³⁴U/²³⁸Ub	SDb	²³⁵U/²³⁸Ub	SDb	Notes
2025-06-26	ML_2	TB-Macusani	measure uranium from unpurified digest	1.15									5.51364e-05	1.89306e-06	0.00730985	1.06145e-05	Blank & Standard Corrected
2025-06-26	ML_3	TB-Macusani	measure uranium from unpurified digest	0.9									5.54403e-05	2.19159e-06	0.00730196	6.43106e-06	Blank & Standard Corrected
2025-06-26	ML_6	TB-Macusani	measure uranium from unpurified digest	1.15									5.60145e-05	1.66899e-06	0.00731476	4.83603e-06	Blank & Standard Corrected
2025-06-26	ML_7	TB-Macusani	measure uranium from unpurified digest	1.6									5.62669e-05	1.07638e-06	0.00732395	4.5332e-06	Blank & Standard Corrected
2025-06-26	ML_7	TB-Macusani	measure uranium from unpurified digest	2.3									5.53567e-05	1.29343e-06	0.00730793	4.35717e-06	Blank & Standard Corrected
2025-06-26	ML_7	TB-Macusani	measure uranium from unpurified digest	1.2									5.57954e-05	1.1825e-06	0.00729813	3.98221e-06	Blank & Standard Corrected
2025-06-27	ML_1	TB-Macusani	measure uranium from purified digest	0.8		UTEVA							5.45387e-05	1.89468e-06	0.00726761	6.77752e-06	Blank & Standard Corrected
2025-06-27	ML_2	TB-Macusani	measure uranium from purified digest	1.45		UTEVA							5.51391e-05	1.04425e-06	0.00725817	3.35069e-06	Blank & Standard Corrected
2025-06-27	ML_3	TB-Macusani	measure uranium from purified digest	1.5		UTEVA							5.52293e-05	9.74184e-07	0.00725737	4.45215e-06	Blank & Standard Corrected
2025-06-27	ML_5	TB-Macusani	measure uranium from purified digest	1.55		UTEVA							5.49452e-05	1.26868e-06	0.00725394	3.92797e-06	Blank & Standard Corrected
2025-06-27	ML_6	TB-Macusani	measure uranium from purified digest	1.4		UTEVA							5.51494e-05	1.08648e-06	0.00725429	3.17543e-06	Blank & Standard Corrected
2025-06-27	ML_7	TB-Macusani	measure uranium from purified digest	1.2		UTEVA							5.49648e-05	1.07085e-06	0.00725413	2.72581e-06	Blank & Standard Corrected
2025-07-01	ML_1	TB-Macusani	uranium recovory from purified digest	2.8	0.752847	UTEVA	0.00325532	9.68434e-06	5.52289e-05	5.70753e-07	0.00725046	6.35213e-06					Blank & Standard Corrected
2025-07-01	ML_2	TB-Macusani	uranium recovory from purified digest	0.7	0.749166	UTEVA	0.00977947	5.54654e-06	5.4877e-05	1.88125e-06	0.00725425	5.18816e-06					Blank & Standard Corrected
2025-07-01	ML_3	TB-Macusani	uranium recovory from purified digest	0.85	0.659778	UTEVA	0.00882554	3.84969e-06	5.49356e-05	2.37316e-06	0.00725225	4.07007e-06					Blank & Standard Corrected
2025-07-01	ML_5	AGV-2G	uranium recovory from purified digest	0.45	0.809201	UTEVA	0.151263	0.000120934	5.52292e-05	2.24099e-05	0.00724987	6.34808e-05					Blank & Standard Corrected
2025-07-01	ML_6	AGV-2G	uranium recovory from purified digest	1.15	0.729765	UTEVA	0.0731956	6.93216e-05	5.46995e-05	1.42243e-05	0.00724502	3.22089e-05					Blank & Standard Corrected
2025-07-01	ML_7	AGV-2G	uranium recovory from purified digest	0.9	0.831322	UTEVA	0.0755986	0.000180184	5.554e-05	1.38564e-05	0.00725966	3.26723e-05					Blank & Standard Corrected
2025-07-01	ML_8	AGV-2G	uranium recovory from purified digest	3.45	0.698949	UTEVA	0.0110176	5.42703e-06	5.49963e-05	1.97114e-06	0.00725354	4.63748e-06					Blank & Standard Corrected
2025-07-09	ML_1	Basalt B3	uranium recovory from purified digest	0.3	0.852952	UTEVA	0.00721407	7.86627e-05	5.7032e-05	9.06229e-06	0.00723607	7.63687e-05					Blank & Standard Corrected
2025-07-09	ML_2	Basalt B3	uranium recovory from purified digest	0.5	0.766528	UTEVA	0.00541363	7.27377e-05	5.69156e-05	6.2391e-06	0.00719869	0.000110359					Blank & Standard Corrected
2025-07-09	ML_3	Basalt B3	uranium recovory from purified digest	0.2	0.765063	UTEVA	0.00540451	6.59357e-05	5.70834e-05	9.65677e-06	0.00715417	5.57586e-05					Blank & Standard Corrected
2025-07-09	ML_5	Basalt B3	uranium recovory from purified digest	0.2	0.000979165	UTEVA	3.02291e-05	9.61444e-06	6.31545e-05	1.45336e-05	0.00719853	0.000130591					Blank & Standard Corrected
2025-07-09	ML_6	Basalt B3	uranium recovory from purified digest	0.15	0.000551525	UTEVA	1.05416e-05	5.46458e-06	6.16216e-05	1.34081e-05	0.00717856	0.000104757					Blank & Standard Corrected
2025-07-09	ML_7	Basalt B3	uranium recovory from purified digest	0.25	0.00346453	UTEVA	3.21618e-05	6.11376e-06	5.69667e-05	7.96797e-06	0.00709897	8.68586e-05					Blank & Standard Corrected
2025-08-13	1-A	NIST612	Testing Axygen microtiter plates	1.35	0.762557	UTEVA			1.95484e-05	1.85851e-06	0.00239397	1.50488e-06					Blank, Standard, and Hydride Corrected
2025-08-13	1-B	NIST612	Testing Axygen microtiter plates	1.55	0.911713	UTEVA			1.17075e-05	2.37066e-06	0.00239604	1.45428e-06					Blank, Standard, and Hydride Corrected
2025-08-13	1-C	NIST612	Testing Axygen microtiter plates	0.9	1.0168	UTEVA			1.15482e-05	1.04409e-06	0.00239543	1.51198e-06					Blank, Standard, and Hydride Corrected
2025-08-13	1-E	NIST612	Testing Axygen microtiter plates	1.15	1.11155	UTEVA			2.48345e-05	7.02739e-06	0.00240045	1.42065e-06					Blank, Standard, and Hydride Corrected
2025-08-13	1-F	NIST612	Testing Axygen microtiter plates	1.35	0.946357	UTEVA			1.40887e-05	5.07779e-07	0.00239811	1.72135e-06					Blank, Standard, and Hydride Corrected
2025-08-13	1-G	NIST612	Testing Axygen microtiter plates	1.15	0.99201	UTEVA			1.2491e-05	2.45902e-07	0.00239605	1.57069e-06					Blank, Standard, and Hydride Corrected
a Uranium isotope ratios measured by multi-ion counting (MIC).
b Uranium isotope ratios measured by Faraday cup detection.
